# Supplementary material for: Fine-Mapping Analysis of the Genes Associated with Pre-Harvest Sprouting Tolerance in Rice (Oryza sativa L.)
Source: MDPI journal article supplement (doi:10.3390/agronomy13030818), 2023-03-10
Supplement: s1 [file s1]

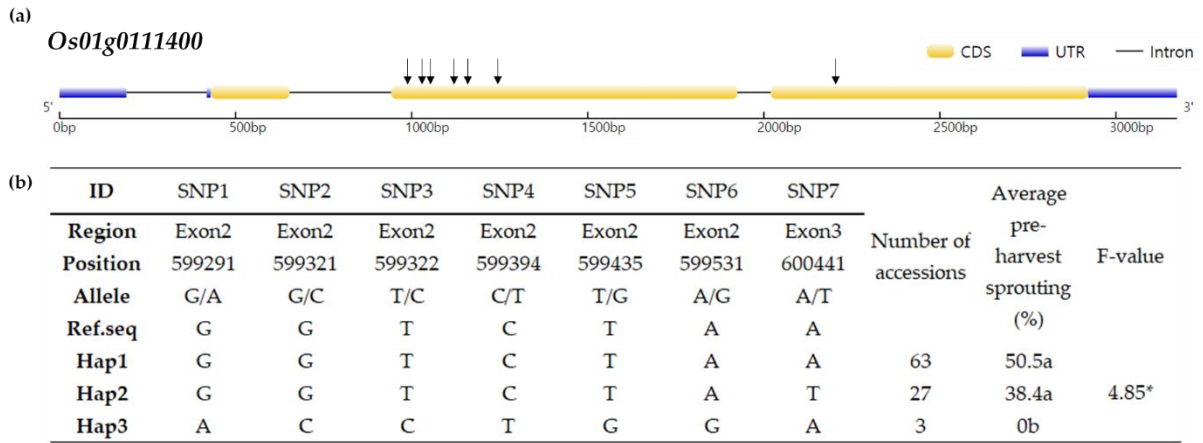

**Figure S2.** Haplotype analysis of candidate genes. (a) Schematic representation of the gene structure and SNP positions in *Os01g0111400*. (b) Results of haplotype analysis of *Os01g0111400*. Yellow and blue blocks and gray lines indicate exons, untranslated regions, and intron regions, respectively. Black vertical bars represent SNPs and InDel regions. Hap: haplotype. Letters a and b represent significant differences at \* $P < 0.05$  (Duncan's test).
