# Supplementary material for: Fine-Mapping Analysis of the Genes Associated with Pre-Harvest Sprouting Tolerance in Rice (Oryza sativa L.)
Source: MDPI journal article supplement (doi:10.3390/agronomy13030818), 2023-03-10
Supplement: s1 [file s1]

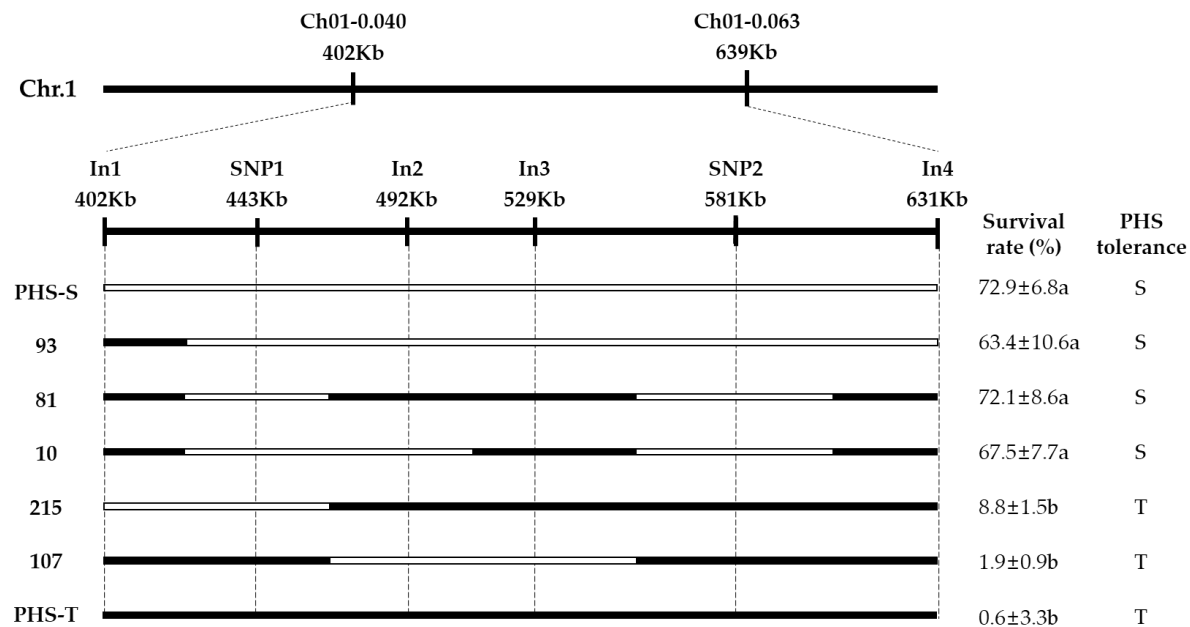

**Figure S1.** Recombination events and their effects on tolerance phenotypes in  $qPHS1^{FC}$  and  $qPHS1^{GC}$  genotypes. Values represent means  $\pm$  SD. Letters a and b represent significant differences at  $P < 0.001$  (Duncan's test).
